# Supplementary material for: Response Relating Factors of Bone Marrow-Derived Mesenchymal Stem Cells Transplantation in Patients with Alcoholic Cirrhosis
Source: Preprints.org preprint supplement (doi:10.20944/preprints201906.0045.v1), 2019-06-05
Supplement: Supplementary file 1 [file supplementary]

## Supplementary files

**Supplement table 1. Multivariate analysis of predictive factors for the responder**

| Variables                        | <i>p</i> -value | Odds ratio |
|----------------------------------|-----------------|------------|
| Age                              | NS              |            |
| Gender (male/female*)            | NS              |            |
| Child-Pugh score                 | NS              |            |
| MELD score                       | NS              |            |
| AST                              | NS              |            |
| ALT                              | NS              |            |
| ALP                              | NS              |            |
| High laennec score               | 0.007           | 3.73       |
| Treatment with BM-MSCs (yea/no*) | 0.033           | 5.75       |

\* reference category

MELD, model for end stage liver disease; AST, aspartate aminotransferase; ALT, alanine aminotransferase; ALP, alkaline phosphatase; BM-MSC, bone marrow-derived mesenchymal stem cell

**Supplement table 2. Significant cellular process between alcoholic cirrhosis and control group**

| <b>Term</b>                    | <b>P-value</b> | <b>Genes</b>                                                           |
|--------------------------------|----------------|------------------------------------------------------------------------|
| Cell part                      | 0.008          | RASA4B, GFRA1, INHBB, KIR3DL2, P4HA1, PDK1, SERPINF1, BNIP3, STC1, ZFY |
| Cell                           | 0.008          | RASA4B, GFRA1, INHBB, KIR3DL2, P4HA1, PDK1, SERPINF1, BNIP3, STC1, ZFY |
| Extracellular region part      | 0.013          | FBN2, GFRA1, INHBB, SERPINF1, STC1                                     |
| Extracellular region           | 0.024          | FBN2, GFRA1, INHBB, SERPINF1, STC1                                     |
| Oxidoreductase complex         | 0.024          | P4HA1, PDK1                                                            |
| Extracellular matrix component | 0.033          | FBN2, SERPINF1                                                         |
| Cytoplasm                      | 0.04           | RASA4B, INHBB, P4HA1, PDK1, SERPINF1, BNIP3, STC1                      |
| Cytoplasmic part               | 0.043          | RASA4B, INHBB, P4HA1, PDK1, SERPINF1, BNIP3                            |
| Extracellular space            | 0.046          | INHBB, SERPINF1, STC1                                                  |

RASA4B, RAS P21 protein activator 4B; GFRA1, GDNF family receptor alpha-1; INHBB, inhibin subunit beta B; KIR3DL2, killer cell immunoglobulin like receptor, three Ig domains and long cytoplasmic tail 2; P4HA1, prolyl 4-hydroxylase subunit alpha-1; PDK1, pyruvate dehydrogenase kinase 1; SERPINF1, pigment epithelium-derived factor (PEDF); BNIP3, BCL2 interacting protein 3; STC1, Stanniocalcin-1; ZFY, zinc finger protein Y-linked; FBN2, fibrillin-2 precursor

**Supplement table 3. Top 10 biological process between alcoholic cirrhosis and control group**

| Term                                   | P-value | Genes                                                                 |
|----------------------------------------|---------|-----------------------------------------------------------------------|
| Response to abiotic stimulus           | 0.0002  | INHBB, PDK1, SERPINF1, BNIP3, STC1                                    |
| Response to external stimulus          | 0.0003  | GFRA1, INHBB, PDK1, SERPINF1, BNIP3, STC1                             |
| Regulation of biological process       | 0.0003  | RASA4B, FBN2, GFRA1, INHBB, KIR3DL2, PDK1, SERPINF1, BNIP3, STC1, ZFY |
| Response to stimulus                   | 0.0004  | RASA4B, FBN2, GFRA1, INHBB, KIR3DL2, PDK1, SERPINF1, BNIP3, STC1      |
| Response to chemical                   | 0.0004  | FBN2, GFRA1, INHBB, PDK1, SERPINF1, BNIP3, STC1                       |
| Cellular response to chemical stimulus | 0.0004  | FBN2, INHBB, PDK1, SERPINF1, BNIP3, STC1                              |
| Cellular response to hypoxia           | 0.0005  | PDK1, BNIP3, STC1                                                     |
| Cellular response to decreased oxygen  | 0.0005  | PDK1, BNIP3, STC1                                                     |
| Biological regulation                  | 0.0005  | RASA4B, FBN2, GFRA1, INHBB, KIR3DL2, PDK1, SERPINF1, BNIP3, STC1, ZFY |
| Cellular response to oxygen levels     | 0.001   | PDK1, BNIP3, STC1                                                     |

INHBB, inhibin subunit beta B; PDK1, pyruvate dehydrogenase kinase 1; SERPINF1, pigment epithelium-derived factor (PEDF); STC1, stanniocalcin-1; BNIP3, BCL2 Interacting protein 3; GFRA1, GDNF family receptor alpha-1; RASA4B, RAS P21 protein activator 4B; FBN2, fibrillin-2 precursor; KIR3DL2, killer cell immunoglobulin like receptor, three Ig domains and long cytoplasmic tail 2; ZFY, zinc finger protein, Y-linked

**Supplement table 4. Significant molecular function between alcoholic cirrhosis and control group**

| <b>Term</b>      | <b>P-value</b> | <b>Genes</b>                                                        |
|------------------|----------------|---------------------------------------------------------------------|
| Binding          | 0.003          | RASA4B, FBN2, GFRA1, INHBB, P4HA1, PDK1, SERPINF1, BNIP3, STC1, ZFY |
| Protein Binding  | 0.012          | FBN2, GFRA1, INHBB, P4HA1, PDK1, SERPINF1, BNIP3, STC1              |
| Hormone Activity | 0.031          | INHBB, STC1                                                         |

INHBB, inhibin subunit beta B; PDK1, pyruvate dehydrogenase kinase 1; SERPINF1, pigment epithelium-derived factor (PEDF); BNIP3, BCL2 interacting protein 3; GFRA1, GDNF family receptor alpha-1; RASA4B, RAS P21 protein activator 4B; FBN2, fibrillin-2 precursor; ZFY, zinc finger protein, Y-Linked; STC1, stanniocalcin-1; P4HA1, prolyl 4-hydroxylase subunit alpha-1.

**Supplement table 5. Profiling of up or down regulated gene expression in BM derived MSCs between alcoholic cirrhosis and control group**

| Gene         | Fold Change | Function                                                                                                                                                                                                   |
|--------------|-------------|------------------------------------------------------------------------------------------------------------------------------------------------------------------------------------------------------------|
| GFRA1        | 2.08        | Cell development, control of neuron survival and differentiation.                                                                                                                                          |
| FBN2         | 2.05        | Regulation of transforming growth factor beta receptor signaling pathway                                                                                                                                   |
| RASA4B       | 1.61        | Regulate cell growth and differentiation, Regulating cell proliferation, survival, growth, migration and differentiation.                                                                                  |
| KIR3DL2      | 1.61        | Regulation of immune system process, cellular defense response                                                                                                                                             |
| MIR4436A     | 1.59        | NA                                                                                                                                                                                                         |
| SERPINF1     | 1.56        | Regulation of stem cell proliferation, supporting stem cell survival and maintaining multipotency. Release by resident stem cells that stimulate migration of cells in early regeneration.                 |
| STC1         | -2.25       | Cell morphogenesis involve in differentiation, multi cellular organismal development, negative regulation of cell migration.<br>Inhibition of ROS production/reduction of ER stress/diminishing TGF beta . |
| RNU5F-1      | -2.23       | NA                                                                                                                                                                                                         |
| TEKT4P2      | -1.96       | NA                                                                                                                                                                                                         |
| ZFY          | -1.69       | Regulation of biosynthetic process, regulation of cellular process.                                                                                                                                        |
| BNIP3        | -1.63       | Immune system process, signal transduction, cell differentiation, negative regulation of apoptotic process.                                                                                                |
| LOC105376694 | -1.62       | NA                                                                                                                                                                                                         |
| PDK1         | -1.60       | Biosynthetic process, stem cell proliferation and migration.                                                                                                                                               |
| INHBB        | -1.58       | Transforming growth factor beta receptor binding, growth factor activity, protein secretion.                                                                                                               |
| P4HA1        | -1.50       | Key enzyme in collagen synthesis, collagen fibril organization.                                                                                                                                            |

GFRA1, GDNF family receptor alpha-1; FBN2, fibrillin-2 precursor; RASA4B, RAS P21 protein activator 4B; KIR3DL2, killer cell immunoglobulin like receptor, three Ig domains and long cytoplasmic tail 2; MIR4436A, microRNA 4436a; SERPINF1, pigment epithelium-derived factor (PEDF); STC1, stanniocalcin-1; RNU5F-1, RNA, U5F small nuclear 1; TEKT4P2, tektin 4 pseudogene 2; ZFY, zinc finger protein, Y-Linked; BNIP3, BCL2 interacting protein 3; PDK1, pyruvate dehydrogenase kinase 1; INHBB, inhibin subunit beta B; P4HA1, prolyl 4-hydroxylase subunit alpha 1
